# Supplementary material for: Waterborne biodegradable polyurethane 3-dimensional porous scaffold for rat cerebral tissue regeneration
Source: Royal Society of Chemistry journal article supplement (doi:10.1039/c5ra20181k), 2015-12-22
Supplement: c5ra20181k1.pdf [file c5ra20181k1.pdf]

## Supporting information

### Waterborne Biodegradable Polyurethane 3-Dimensional Porous Scaffold For Rat Cerebral Tissue Regeneration

Yan-Chao Wang<sup>a,1</sup>, Fang Fang<sup>a,1,\*</sup>, Ying-Ke Wu<sup>b</sup>, Xiao-Lin Ai<sup>a</sup>, Ting Lan<sup>c</sup>, Rui-Chao Liang<sup>a</sup>, Yu Zhang<sup>d</sup>, Narasimha Murthy Trishul<sup>a</sup>, Min He<sup>a</sup>, Chao You<sup>a</sup>, Chuan Yu<sup>e</sup> and Hong Tan<sup>b,\*</sup>

a Department of Neurosurgery, West China Hospital, Sichuan University, Chengdu, 610041, Sichuan, People's Republic of China.

b College of Polymer Science and Engineering, State Key Laboratory of Polymer Materials Engineering, Sichuan University, Chengdu 610065, People's Republic of China.

c Department of Pathology, West China Hospital, Sichuan University, Chengdu, 610041, Sichuan, People's Republic of China.

d Department of Neurosurgery, Affiliated Hospital/Clinical Medical College of Chengdu University, Chengdu, 610081, Sichuan, People's Republic of China.

e State Key Laboratory of Biotherapy and Cancer Center, West China Hospital, Sichuan University, Chengdu 610041, People's Republic of China

**This work** was financially supported by the projects of National Natural Science Foundation of China (contract/grant number: 81100925, 81472361, 51273124, 51273126) and the National Science Fund for Distinguished Young Scholars of China (contract/grant number: 51425305)

<sup>1</sup> **First Author:** Fang Fang contributed equally to this work with Yan-Chao Wang,

and is the co-first author for this paper.

**\*Corresponding authors:** Fang Fang and Hong Tan.

Tel.: +86-28-85460961; fax: +86-28-85405402.

E-mail addresses: [merrisn@hotmail.com](mailto:merrisn@hotmail.com) and [wyc89890707@icloud.com](mailto:wyc89890707@icloud.com) (F. Fang);  
[hongtan@scu.edu.cn](mailto:hongtan@scu.edu.cn) (H. Tan).

*Synthetic method of Waterborne Biodegradable Polyurethane 3-Dimensional porous scaffold*

Firstly, L-lysine diisocyanate(LDI) and 1% of organic bismuth was added in to the stirred poly ethylene glycol (PEG, molecular weight 1450) and poly  $\epsilon$ -caprolactone (PCL, molecular weight 2000) at 80 °C under a dry nitrogen atmosphere. The 1, 3-propanediol (PDO) was added to melting reaction mixture for 2h at 65°C as a chain extender. Secondly the prepolymer was mixed with L-lysine solution to emulsify, meanwhile, adjusting the PH of system to 8.0 by using dilute sodium hydroxide solution for 3h. Then emulsion was dropped into a 48wells plate the diameter of each well is about 1.0 cm to form the scaffold with thickness around 3.0mm. The 48wells plate with emulsion were kept in refrigerator at 4°C for 4h, then it transferred to -25°C for 24h as pre-freezing before freeze-drying. The pre-frozen emulsion in 48wells plate was lyophilized in a freeze-dryer (Boyikang, Beijing) for 24h to dry sample completely (Fig1)<sup>1</sup>. To synthesis WBPU 17 and WBPU25 we changed mole content of PEG in soft segment as 17% and 25%.

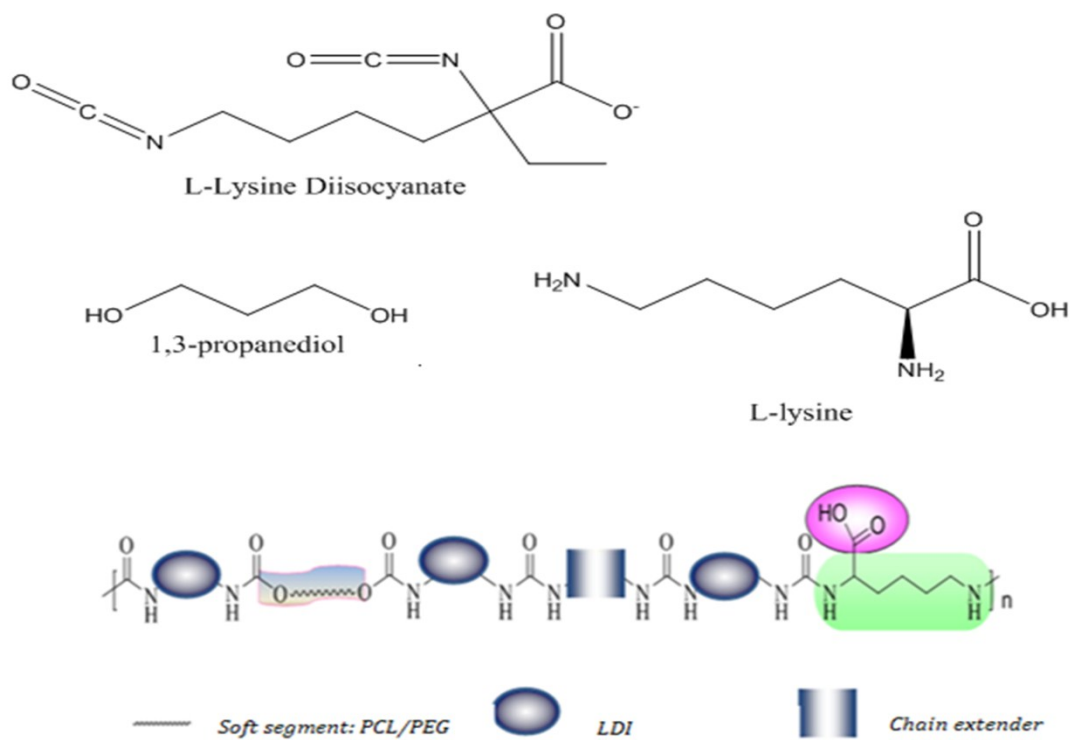

Fig S1: Schematic diagram of Waterborne Biodegradable Polyurethane (WBPU) 3-Dimensional porous scaffold

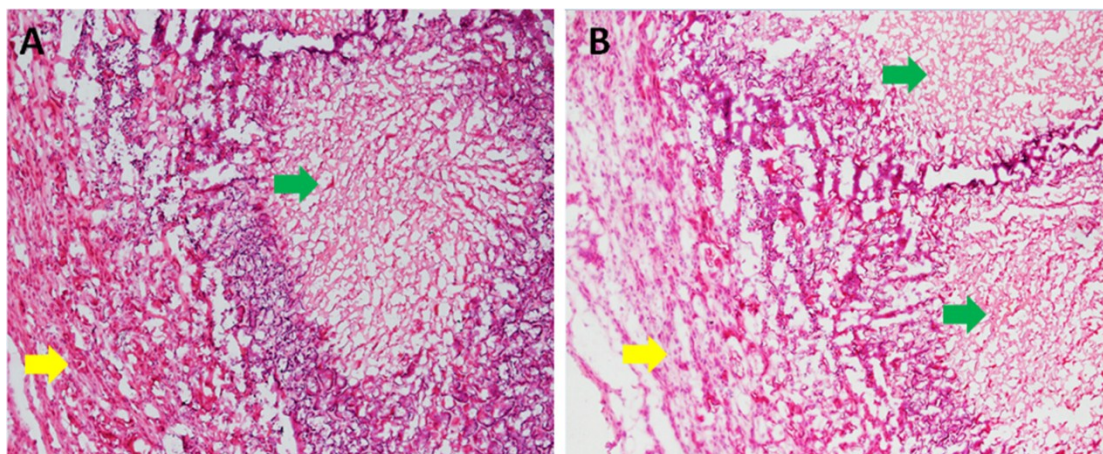

Fig S2: HE stain of WBPU25 treated rat's brain tissue at magnification of 100X (A) and 200 X (B) shows the infiltration of cells into the WBPU25 (Yellow arrow) and scaffold (Green arrow) at eight weeks postoperative *in vivo*.

**Reference:**

1. X. Jiang, F. Yu, Z. Wang, J. Li, H. Tan, M. Ding and Q. Fu, *Journal of Biomaterials Science, Polymer Edition*, 2010, **21**, 1637-1652.
